# Supplementary material for: N‐glycosylated GPNMB ligand independently activates mutated EGFR signaling and promotes metastasis in NSCLC
Source: PubMed Central journal article supplement — Cancer Sci. 2021 Mar 30;112(5):1911–23. doi: 10.1111/cas.14872 (PMC8088973; doi:10.1111/cas.14872), 2021-03-30
Supplement: CAS-112-1911-s001.pdf [file CAS-112-1911-s001.pdf]

## Figure S2

A

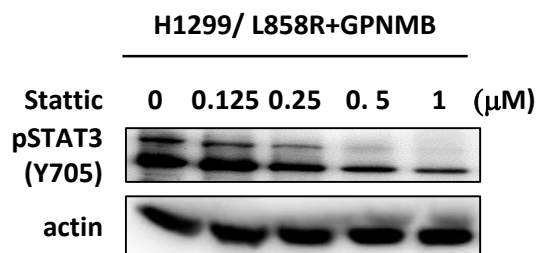

B

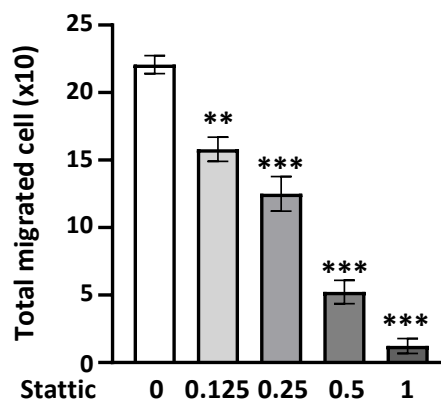

C

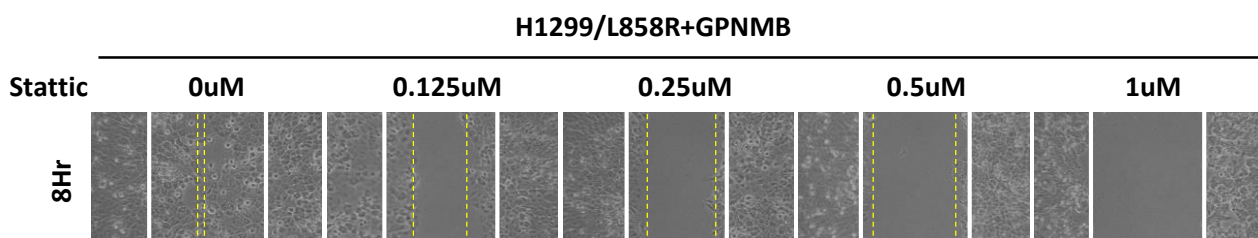

**Fig. S2. Stattic inhibit the synergistic effect of GPNMB on promoting EGFR-L858R cell migration.** H1299/L858R+GPNMB stable cells were treated with different dose of Stattic, a small-molecule inhibitor of STAT3 activation and dimerization, and examined the effects of STAT3 inhibition on cell migratory abilities by wound healing assays. (A) Inhibition of pSTAT3 examined by immunoblotting. (B and C) Photos of each group were taken at 0hr and after treated with Stattic for 8hr; and the migrated cells were counted and analyzed by one way ANOVA (\*\*  $P < 0.01$ , \*\*\*  $P < 0.001$ ).
