# Supplementary material for: N‐glycosylated GPNMB ligand independently activates mutated EGFR signaling and promotes metastasis in NSCLC
Source: PubMed Central journal article supplement — Cancer Sci. 2021 Mar 30;112(5):1911–23. doi: 10.1111/cas.14872 (PMC8088973; doi:10.1111/cas.14872), 2021-03-30
Supplement: CAS-112-1911-s002.pdf [file CAS-112-1911-s002.pdf]

## Figure S4

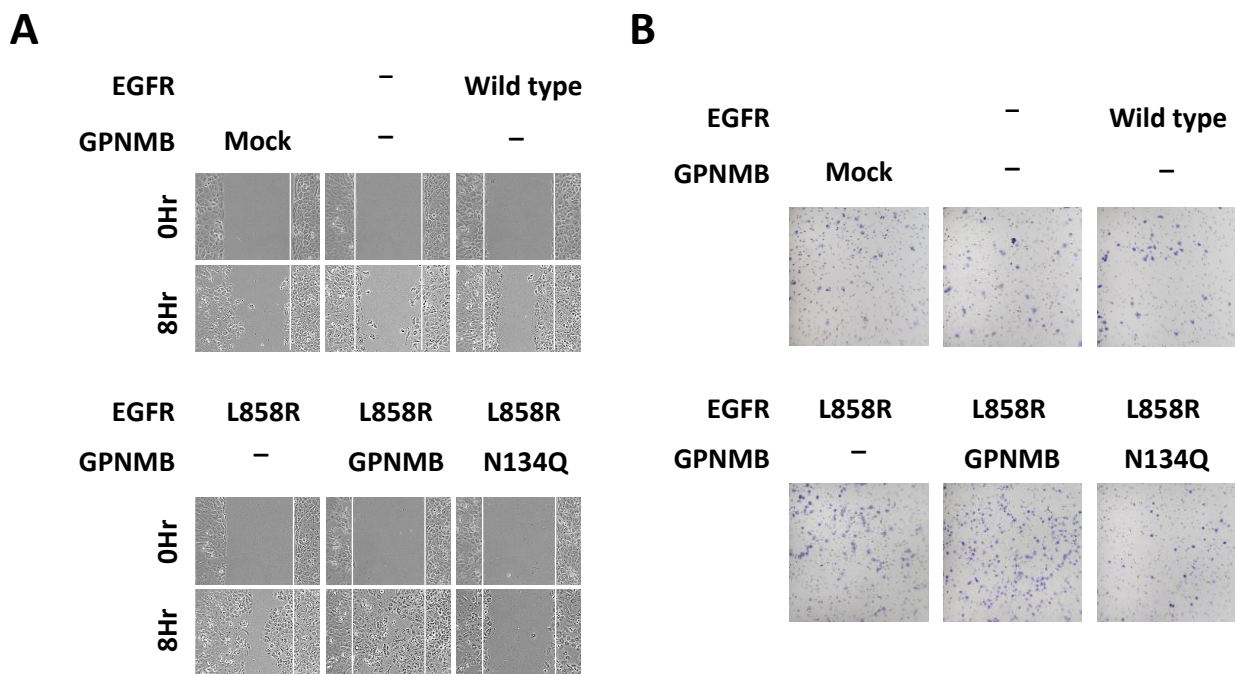

**Fig. S4. Photos of cell migration and invasion in Fig.4E.** The migratory and invasive abilities of H1299/ mock, H1299/ EGFR-wild-type, H1299/ EGFR-L858R, H1299/ EGFR-L858R+GPNMB-wild-type, and H1299/ EGFR-L858R+GPNMB-N134Q cells were examined by wound healing assay and modified boyden chamber invasion assay. (A) Photos of migration assay were taken at 0h and 8h after removing the chamber; and the migrated cells were counted. (B) Photos of invasion assay were taken after stained with 10% Gemisa Stain solution.
