# Supplementary material for: N‐glycosylated GPNMB ligand independently activates mutated EGFR signaling and promotes metastasis in NSCLC
Source: PubMed Central journal article supplement — Cancer Sci. 2021 Mar 30;112(5):1911–23. doi: 10.1111/cas.14872 (PMC8088973; doi:10.1111/cas.14872), 2021-03-30
Supplement: CAS-112-1911-s005.pdf [file CAS-112-1911-s005.pdf]

## Figure S3

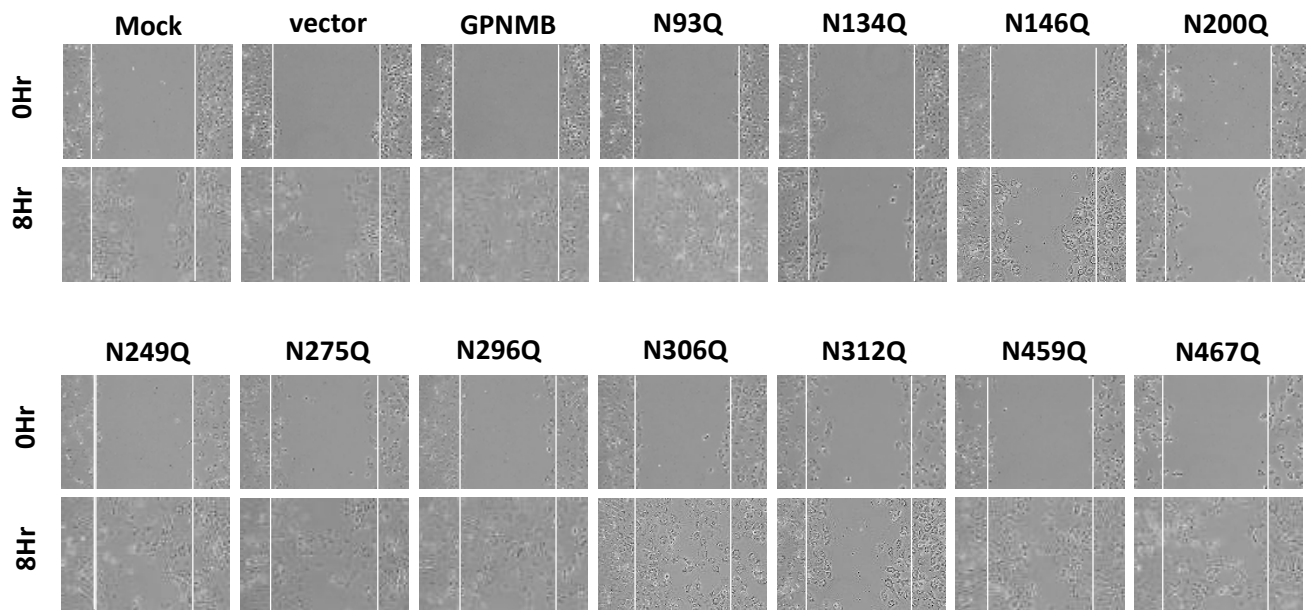

**Fig. S3. Photos of wound healing assays in Fig. 4C.** Photos of the experimental cells were taken at 0 h and 8 h after removing the chamber wells; and the migrated cell numbers in the wound were counted.
