# Supplementary material for: N‐glycosylated GPNMB ligand independently activates mutated EGFR signaling and promotes metastasis in NSCLC
Source: PubMed Central journal article supplement — Cancer Sci. 2021 Mar 30;112(5):1911–23. doi: 10.1111/cas.14872 (PMC8088973; doi:10.1111/cas.14872), 2021-03-30
Supplement: CAS-112-1911-s006.pdf [file CAS-112-1911-s006.pdf]

**Figure S5**

**A**

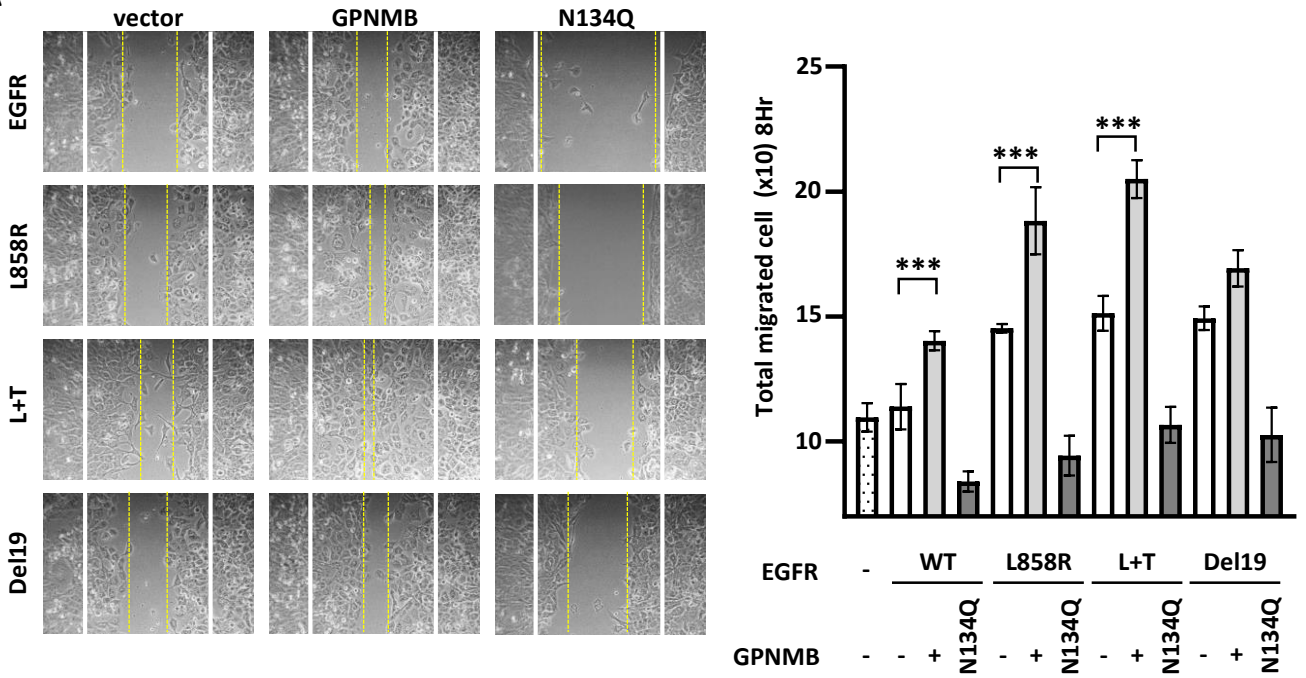

**B**

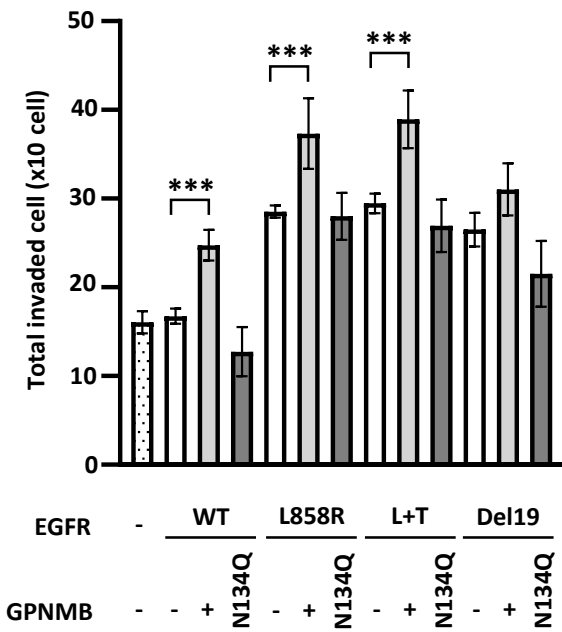

**C**

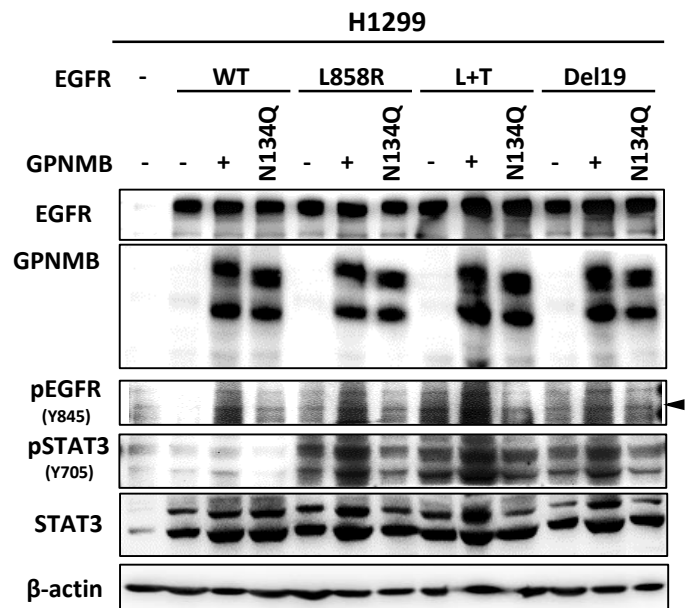

**Fig. S5. Effects of GPNMB wild-type and N134Q mutant on mutated EGFR-induced cell migration and invasion and its downstream signaling.** GPNMB wild-type/ N134Q mutant and various EGFR mutants were co-transfected into H1299 cells and examined cell migratory and invasive abilities by wound healing and modified boyden chamber invasion assays. (A) Pictures of wound healing assays were taken at 8 h after removing the chamber wells, and the migrated cell numbers in the wound were analysis. (B) The invasive cells of modified Boyden chamber invasion assay were stained with 10% Gemisa Stain solution and the invaded cell numbers were counted. (n=3 for each group, \*\*\* P< 0.001, nonparametric multiple comparison test) (C) The EGFR downstream signaling of the co-transfected cells were examined by immunoblotting; arrowhead indicates the band of EGFR Y845 phosphorylation.
